# Supplementary material for: Effect of Arthrospira (Spirulina) maxima Supplementation and a Systematic Physical Exercise Program on the Body Composition and Cardiorespiratory Fitness of Overweight or Obese Subjects: A Double-Blind, Randomized, and Crossover Controlled Trial
Source: MDPI journal article supplement (doi:10.3390/md16100364), 2018-10-01
Supplement: s1 [file s1]

## Supplementary File 4 - Outputs of Mann Whitney U Tests (SPSS)

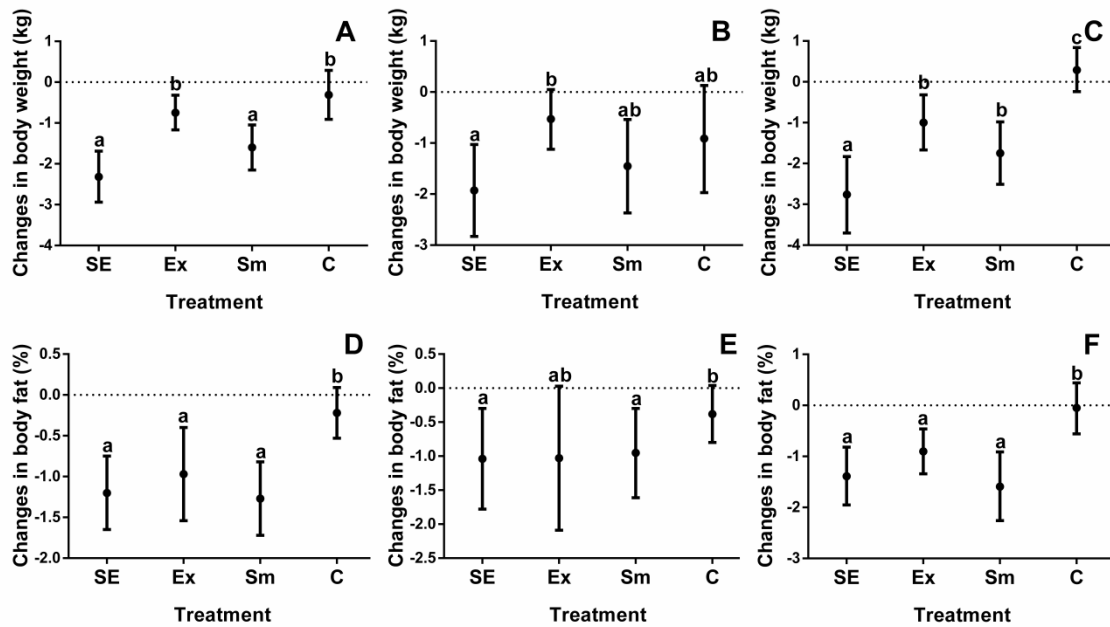

**Figure 1.** Changes in body weight and body fat percentage by treatments. SE: *Spirulina* and exercise; Ex: Exercise and placebo; Sm: *Spirulina* without exercise; and C: Control (Placebo treatment). (A) Total body weight changes of subjects; (B) Body weight changes in overweight subjects; (C) Body weight changes in subjects with obesity; (D) Total body fat changes of subjects; (E) Body fat changes in overweight subjects; and (F) Body fat changes in subjects with obesity. Data are shown as the mean, with 95% confidence intervals. Different letters indicate the statistical differences between groups ( $p < 0.05$ ).

**Figure 1A**

**SE vs Ex**

**Test Statistics<sup>a</sup>**

|                        | Changes_BW |
|------------------------|------------|
| Mann-Whitney U         | 152.500    |
| Wilcoxon W             | 558.500    |
| Z                      | -4.020     |
| Asymp. Sig. (2-tailed) | .000       |

a. Grouping Variable: Group\_TOTAL

**Ex vs C**

**Test Statistics<sup>a</sup>**

|                        | Changes_BW |
|------------------------|------------|
| Mann-Whitney U         | 244.000    |
| Wilcoxon W             | 650.000    |
| Z                      | -1.729     |
| Asymp. Sig. (2-tailed) | .084       |

a. Grouping Variable: Group\_TOTAL

**SE vs Sm**

**Test Statistics<sup>a</sup>**

|                        | Changes_BW |
|------------------------|------------|
| Mann-Whitney U         | 242.500    |
| Wilcoxon W             | 648.500    |
| Z                      | -1.769     |
| Asymp. Sig. (2-tailed) | .077       |

a. Grouping Variable: Group\_TOTAL

**Sm vs C**

**Test Statistics<sup>a</sup>**

|                        | Changes_BW |
|------------------------|------------|
| Mann-Whitney U         | 126.500    |
| Wilcoxon W             | 426.500    |
| Z                      | -3.379     |
| Asymp. Sig. (2-tailed) | .001       |

a. Grouping Variable: Group\_TOTAL

**SE vs C**

**Test Statistics<sup>a</sup>**

|                        | Changes_BW |
|------------------------|------------|
| Mann-Whitney U         | 96.000     |
| Wilcoxon W             | 502.000    |
| Z                      | -4.464     |
| Asymp. Sig. (2-tailed) | .000       |

a. Grouping Variable: Group\_TOTAL

**Ex vs Sm**

**Test Statistics<sup>a</sup>**

|                        | Changes_BW |
|------------------------|------------|
| Mann-Whitney U         | 207.000    |
| Wilcoxon W             | 507.000    |
| Z                      | -2.438     |
| Asymp. Sig. (2-tailed) | .015       |

a. Grouping Variable: Group\_TOTAL

**Figure 1B**

**SE vs Ex**

**Test Statistics<sup>a</sup>**

|                                | Changes_BW        |
|--------------------------------|-------------------|
| Mann-Whitney U                 | 55.000            |
| Wilcoxon W                     | 175.000           |
| Z                              | -2.477            |
| Asymp. Sig. (2-tailed)         | .013              |
| Exact Sig. [2*(1-tailed Sig.)] | .016 <sup>b</sup> |

a. Grouping Variable: Group\_OW\_Ob

b. Not corrected for ties.

**Ex vs Sm**

**Test Statistics<sup>a</sup>**

|                                | Changes_BW        |
|--------------------------------|-------------------|
| Mann-Whitney U                 | 56.000            |
| Wilcoxon W                     | 134.000           |
| Z                              | -1.722            |
| Asymp. Sig. (2-tailed)         | .085              |
| Exact Sig. [2*(1-tailed Sig.)] | .103 <sup>b</sup> |

a. Grouping Variable: Group\_OW\_Ob

b. Not corrected for ties.

**SE vs Sm**

**Test Statistics<sup>a</sup>**

|                                | Changes_BW        |
|--------------------------------|-------------------|
| Mann-Whitney U                 | 76.000            |
| Wilcoxon W                     | 196.000           |
| Z                              | -.699             |
| Asymp. Sig. (2-tailed)         | .484              |
| Exact Sig. [2*(1-tailed Sig.)] | .516 <sup>b</sup> |

a. Grouping Variable: Group\_OW\_Ob

b. Not corrected for ties.

**Ex vs C**

**Test Statistics<sup>a</sup>**

|                                | Changes_BW        |
|--------------------------------|-------------------|
| Mann-Whitney U                 | 78.500            |
| Wilcoxon W                     | 156.500           |
| Z                              | -.584             |
| Asymp. Sig. (2-tailed)         | .559              |
| Exact Sig. [2*(1-tailed Sig.)] | .581 <sup>b</sup> |

a. Grouping Variable: Group\_OW\_Ob

b. Not corrected for ties.

**SE vs C**

**Test Statistics<sup>a</sup>**

|                                | Changes_BW        |
|--------------------------------|-------------------|
| Mann-Whitney U                 | 58.000            |
| Wilcoxon W                     | 178.000           |
| Z                              | -1.597            |
| Asymp. Sig. (2-tailed)         | .110              |
| Exact Sig. [2*(1-tailed Sig.)] | .126 <sup>b</sup> |

a. Grouping Variable: Group\_OW\_Ob

b. Not corrected for ties.

**Sm vs C**

**Test Statistics<sup>a</sup>**

|                                | Changes_BW        |
|--------------------------------|-------------------|
| Mann-Whitney U                 | 53.500            |
| Wilcoxon W                     | 131.500           |
| Z                              | -1.090            |
| Asymp. Sig. (2-tailed)         | .276              |
| Exact Sig. [2*(1-tailed Sig.)] | .291 <sup>b</sup> |

a. Grouping Variable: Group\_OW\_Ob

b. Not corrected for ties.

**Figure 1C**

**SE vs Ex**

**Test Statistics<sup>a</sup>**

|                                | Changes_BW        |
|--------------------------------|-------------------|
| Mann-Whitney U                 | 19.500            |
| Wilcoxon W                     | 110.500           |
| Z                              | -3.422            |
| Asymp. Sig. (2-tailed)         | .001              |
| Exact Sig. [2*(1-tailed Sig.)] | .000 <sup>b</sup> |

a. Grouping Variable: Group\_OW\_Ob

b. Not corrected for ties.

**Ex vs Sm**

**Test Statistics<sup>a</sup>**

|                                | Changes_BW        |
|--------------------------------|-------------------|
| Mann-Whitney U                 | 50.000            |
| Wilcoxon W                     | 128.000           |
| Z                              | -1.561            |
| Asymp. Sig. (2-tailed)         | .119              |
| Exact Sig. [2*(1-tailed Sig.)] | .137 <sup>b</sup> |

a. Grouping Variable: Group\_OW\_Ob

b. Not corrected for ties.

**SE vs Sm**

**Test Statistics<sup>a</sup>**

|                                | Changes_BW        |
|--------------------------------|-------------------|
| Mann-Whitney U                 | 40.000            |
| Wilcoxon W                     | 131.000           |
| Z                              | -2.172            |
| Asymp. Sig. (2-tailed)         | .030              |
| Exact Sig. [2*(1-tailed Sig.)] | .040 <sup>b</sup> |

a. Grouping Variable: Group\_OW\_Ob

b. Not corrected for ties.

**Ex vs C**

**Test Statistics<sup>a</sup>**

|                                | Changes_BW        |
|--------------------------------|-------------------|
| Mann-Whitney U                 | 26.500            |
| Wilcoxon W                     | 117.500           |
| Z                              | -2.852            |
| Asymp. Sig. (2-tailed)         | .004              |
| Exact Sig. [2*(1-tailed Sig.)] | .004 <sup>b</sup> |

a. Grouping Variable: Group\_OW\_Ob

b. Not corrected for ties.

**SE vs C**

**Test Statistics<sup>a</sup>**

|                                | Changes_BW        |
|--------------------------------|-------------------|
| Mann-Whitney U                 | .500              |
| Wilcoxon W                     | 91.500            |
| Z                              | -4.299            |
| Asymp. Sig. (2-tailed)         | .000              |
| Exact Sig. [2*(1-tailed Sig.)] | .000 <sup>b</sup> |

a. Grouping Variable: Group\_OW\_Ob

b. Not corrected for ties.

**Sm vs C**

**Test Statistics<sup>a</sup>**

|                                | Changes_BW        |
|--------------------------------|-------------------|
| Mann-Whitney U                 | 7.000             |
| Wilcoxon W                     | 85.000            |
| Z                              | -3.795            |
| Asymp. Sig. (2-tailed)         | .000              |
| Exact Sig. [2*(1-tailed Sig.)] | .000 <sup>b</sup> |

a. Grouping Variable: Group\_OW\_Ob

b. Not corrected for ties.

**Figure 1D**

**SE vs Ex**

**Test Statistics<sup>a</sup>**

|                        | Changes_BF |
|------------------------|------------|
| Mann-Whitney U         | 283,500    |
| Wilcoxon W             | 689,500    |
| Z                      | -1,780     |
| Asymp. Sig. (2-tailed) | ,075       |

a. Grouping Variable: Group\_TOTAL

**Ex vs Sm**

**Test Statistics<sup>a</sup>**

|                        | Changes_BF |
|------------------------|------------|
| Mann-Whitney U         | 232,000    |
| Wilcoxon W             | 532,000    |
| Z                      | -1,912     |
| Asymp. Sig. (2-tailed) | ,056       |

a. Grouping Variable: Group\_TOTAL

**SE vs Sm**

**Test Statistics<sup>a</sup>**

|                        | Changes_BF |
|------------------------|------------|
| Mann-Whitney U         | 325,500    |
| Wilcoxon W             | 625,500    |
| Z                      | -,193      |
| Asymp. Sig. (2-tailed) | ,847       |

a. Grouping Variable: Group\_TOTAL

**Ex vs C**

**Test Statistics<sup>a</sup>**

|                        | Changes_BF |
|------------------------|------------|
| Mann-Whitney U         | 172,000    |
| Wilcoxon W             | 578,000    |
| Z                      | -3,016     |
| Asymp. Sig. (2-tailed) | ,003       |

a. Grouping Variable: Group\_TOTAL

**SE vs C**

**Test Statistics<sup>a</sup>**

|                        | Changes_BF |
|------------------------|------------|
| Mann-Whitney U         | 138,000    |
| Wilcoxon W             | 544,000    |
| Z                      | -3,640     |
| Asymp. Sig. (2-tailed) | ,000       |

a. Grouping Variable: Group\_TOTAL

**Sm vs C**

**Test Statistics<sup>a</sup>**

|                        | Changes_BF |
|------------------------|------------|
| Mann-Whitney U         | 100,500    |
| Wilcoxon W             | 400,500    |
| Z                      | -3,873     |
| Asymp. Sig. (2-tailed) | ,000       |

a. Grouping Variable: Group\_TOTAL

**Figure 1E**

**SE vs Ex**

**Test Statistics<sup>a</sup>**

|                                | Changes_BF        |
|--------------------------------|-------------------|
| Mann-Whitney U                 | 87,000            |
| Wilcoxon W                     | 207,000           |
| Z                              | -1,059            |
| Asymp. Sig. (2-tailed)         | ,290              |
| Exact Sig. [2*(1-tailed Sig.)] | ,305 <sup>b</sup> |

a. Grouping Variable: Group\_OW\_Ob

b. Not corrected for ties.

**Ex vs Sm**

**Test Statistics<sup>a</sup>**

|                                | Changes_BF        |
|--------------------------------|-------------------|
| Mann-Whitney U                 | 64,500            |
| Wilcoxon W                     | 142,500           |
| Z                              | -1,247            |
| Asymp. Sig. (2-tailed)         | ,212              |
| Exact Sig. [2*(1-tailed Sig.)] | ,217 <sup>b</sup> |

a. Grouping Variable: Group\_OW\_Ob

b. Not corrected for ties.

**SE vs Sm**

**Test Statistics<sup>a</sup>**

|                                | Changes_BF        |
|--------------------------------|-------------------|
| Mann-Whitney U                 | 85,500            |
| Wilcoxon W                     | 205,500           |
| Z                              | -,220             |
| Asymp. Sig. (2-tailed)         | ,826              |
| Exact Sig. [2*(1-tailed Sig.)] | ,829 <sup>b</sup> |

a. Grouping Variable: Group\_OW\_Ob

b. Not corrected for ties.

**Ex vs C**

**Test Statistics<sup>a</sup>**

|                                | Changes_BF        |
|--------------------------------|-------------------|
| Mann-Whitney U                 | 60,500            |
| Wilcoxon W                     | 180,500           |
| Z                              | -1,444            |
| Asymp. Sig. (2-tailed)         | ,149              |
| Exact Sig. [2*(1-tailed Sig.)] | ,152 <sup>b</sup> |

a. Grouping Variable: Group\_OW\_Ob

b. Not corrected for ties.

**SE vs C**

**Test Statistics<sup>a</sup>**

|                                | Changes_BF        |
|--------------------------------|-------------------|
| Mann-Whitney U                 | 48,000            |
| Wilcoxon W                     | 168,000           |
| Z                              | -2,052            |
| Asymp. Sig. (2-tailed)         | ,040              |
| Exact Sig. [2*(1-tailed Sig.)] | ,041 <sup>b</sup> |

a. Grouping Variable: Group\_OW\_Ob

b. Not corrected for ties.

**Sm vs C**

**Test Statistics<sup>a</sup>**

|                                | Changes_BF        |
|--------------------------------|-------------------|
| Mann-Whitney U                 | 36,500            |
| Wilcoxon W                     | 114,500           |
| Z                              | -2,054            |
| Asymp. Sig. (2-tailed)         | ,040              |
| Exact Sig. [2*(1-tailed Sig.)] | ,039 <sup>b</sup> |

a. Grouping Variable: Group\_OW\_Ob

b. Not corrected for ties.

**Figure 1F**

**SE vs Ex**

**Test Statistics<sup>a</sup>**

|                                | Changes_BF        |
|--------------------------------|-------------------|
| Mann-Whitney U                 | 60,500            |
| Wilcoxon W                     | 151,500           |
| Z                              | -1,233            |
| Asymp. Sig. (2-tailed)         | ,217              |
| Exact Sig. [2*(1-tailed Sig.)] | ,223 <sup>b</sup> |

a. Grouping Variable: Group\_OW\_Ob

b. Not corrected for ties.

**Ex vs Sm**

**Test Statistics<sup>a</sup>**

|                                | Changes_BF        |
|--------------------------------|-------------------|
| Mann-Whitney U                 | 49,000            |
| Wilcoxon W                     | 127,000           |
| Z                              | -1,581            |
| Asymp. Sig. (2-tailed)         | ,114              |
| Exact Sig. [2*(1-tailed Sig.)] | ,123 <sup>b</sup> |

a. Grouping Variable: Group\_OW\_Ob

b. Not corrected for ties.

**SE vs Sm**

**Test Statistics<sup>a</sup>**

|                                | Changes_BF        |
|--------------------------------|-------------------|
| Mann-Whitney U                 | 66,500            |
| Wilcoxon W                     | 144,500           |
| Z                              | -,627             |
| Asymp. Sig. (2-tailed)         | ,531              |
| Exact Sig. [2*(1-tailed Sig.)] | ,538 <sup>b</sup> |

a. Grouping Variable: Group\_OW\_Ob

b. Not corrected for ties.

**Ex vs C**

**Test Statistics<sup>a</sup>**

|                                | Changes_BF        |
|--------------------------------|-------------------|
| Mann-Whitney U                 | 26,500            |
| Wilcoxon W                     | 117,500           |
| Z                              | -2,808            |
| Asymp. Sig. (2-tailed)         | ,005              |
| Exact Sig. [2*(1-tailed Sig.)] | ,004 <sup>b</sup> |

a. Grouping Variable: Group\_OW\_Ob

b. Not corrected for ties.

**SE vs C**

**Test Statistics<sup>a</sup>**

|                                | Changes_BF        |
|--------------------------------|-------------------|
| Mann-Whitney U                 | 19,500            |
| Wilcoxon W                     | 110,500           |
| Z                              | -3,189            |
| Asymp. Sig. (2-tailed)         | ,001              |
| Exact Sig. [2*(1-tailed Sig.)] | ,001 <sup>b</sup> |

a. Grouping Variable: Group\_OW\_Ob

b. Not corrected for ties.

**Sm vs C**

**Test Statistics<sup>a</sup>**

|                                | Changes_BF        |
|--------------------------------|-------------------|
| Mann-Whitney U                 | 13,000            |
| Wilcoxon W                     | 91,000            |
| Z                              | -3,417            |
| Asymp. Sig. (2-tailed)         | ,001              |
| Exact Sig. [2*(1-tailed Sig.)] | ,000 <sup>b</sup> |

a. Grouping Variable: Group\_OW\_Ob

b. Not corrected for ties.

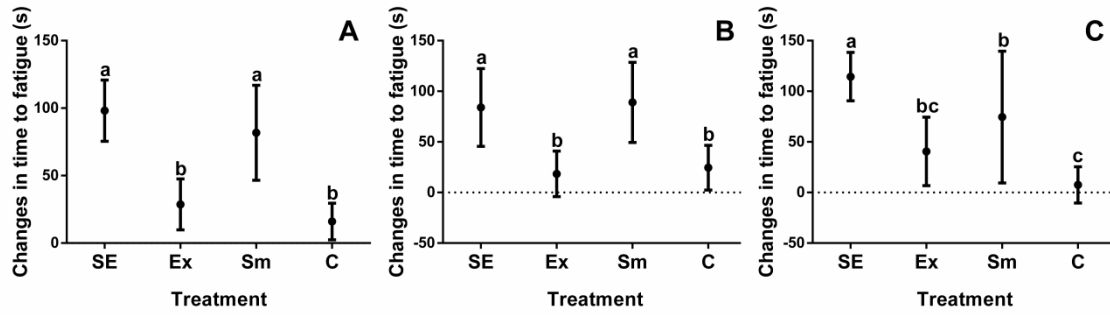

**Figure 2.** Changes in time to fatigue by treatments. SE: *Spirulina* and exercise; Ex: Exercise and placebo; Sm: *Spirulina* without exercise; and C: Control (Placebo treatment). (A) Total time to fatigue changes of subjects; (B) Time to fatigue changes in overweight subjects; and (C) Time to fatigue changes in obesity subjects. Data are shown as the mean, with 95% confidence intervals. Different letters indicate the statistical differences between groups ( $p < 0.05$ ).



**Figure 2A**

**SE vs Ex**

**Test Statistics<sup>a</sup>**

|                        | Changes_TF |
|------------------------|------------|
| Mann-Whitney U         | 146,500    |
| Wilcoxon W             | 552,500    |
| Z                      | -4,040     |
| Asymp. Sig. (2-tailed) | ,000       |

a. Grouping Variable: Group\_TOTAL

**Ex vs Sm**

**Test Statistics<sup>a</sup>**

|                        | Changes_TF |
|------------------------|------------|
| Mann-Whitney U         | 201,000    |
| Wilcoxon W             | 607,000    |
| Z                      | -2,510     |
| Asymp. Sig. (2-tailed) | ,012       |

a. Grouping Variable: Group\_TOTAL

**SE vs Sm**

**Test Statistics<sup>a</sup>**

|                        | Changes_TF |
|------------------------|------------|
| Mann-Whitney U         | 256,500    |
| Wilcoxon W             | 556,500    |
| Z                      | -1,464     |
| Asymp. Sig. (2-tailed) | ,143       |

a. Grouping Variable: Group\_TOTAL

**Ex vs C**

**Test Statistics<sup>a</sup>**

|                        | Changes_TF |
|------------------------|------------|
| Mann-Whitney U         | 273,500    |
| Wilcoxon W             | 573,500    |
| Z                      | -1,208     |
| Asymp. Sig. (2-tailed) | ,227       |

a. Grouping Variable: Group\_TOTAL

**SE vs C**

**Test Statistics<sup>a</sup>**

|                        | Changes_TF |
|------------------------|------------|
| Mann-Whitney U         | 72,500     |
| Wilcoxon W             | 372,500    |
| Z                      | -4,926     |
| Asymp. Sig. (2-tailed) | ,000       |

a. Grouping Variable: Group\_TOTAL

**Sm vs C**

**Test Statistics<sup>a</sup>**

|                        | Changes_TF |
|------------------------|------------|
| Mann-Whitney U         | 122,500    |
| Wilcoxon W             | 422,500    |
| Z                      | -3,566     |
| Asymp. Sig. (2-tailed) | ,000       |

a. Grouping Variable: Group\_TOTAL

**Figure 2B**

**SE vs Ex**

**Test Statistics<sup>a</sup>**

|                                | Changes_TF        |
|--------------------------------|-------------------|
| Mann-Whitney U                 | 47,500            |
| Wilcoxon W                     | 167,500           |
| Z                              | -2,734            |
| Asymp. Sig. (2-tailed)         | ,006              |
| Exact Sig. [2*(1-tailed Sig.)] | ,006 <sup>b</sup> |

a. Grouping Variable: Group\_OW\_Ob

b. Not corrected for ties.

**Ex vs Sm**

**Test Statistics<sup>a</sup>**

|                                | Changes_TF        |
|--------------------------------|-------------------|
| Mann-Whitney U                 | 31,500            |
| Wilcoxon W                     | 151,500           |
| Z                              | -2,894            |
| Asymp. Sig. (2-tailed)         | ,004              |
| Exact Sig. [2*(1-tailed Sig.)] | ,003 <sup>b</sup> |

a. Grouping Variable: Group\_OW\_Ob

b. Not corrected for ties.

**SE vs Sm**

**Test Statistics<sup>a</sup>**

|                                | Changes_TF        |
|--------------------------------|-------------------|
| Mann-Whitney U                 | 84,000            |
| Wilcoxon W                     | 204,000           |
| Z                              | -,294             |
| Asymp. Sig. (2-tailed)         | ,769              |
| Exact Sig. [2*(1-tailed Sig.)] | ,792 <sup>b</sup> |

a. Grouping Variable: Group\_OW\_Ob

b. Not corrected for ties.

**Ex vs C**

**Test Statistics<sup>a</sup>**

|                                | Changes_TF        |
|--------------------------------|-------------------|
| Mann-Whitney U                 | 81,500            |
| Wilcoxon W                     | 201,500           |
| Z                              | -,447             |
| Asymp. Sig. (2-tailed)         | ,655              |
| Exact Sig. [2*(1-tailed Sig.)] | ,683 <sup>b</sup> |

a. Grouping Variable: Group\_OW\_Ob

b. Not corrected for ties.

**SE vs C**

**Test Statistics<sup>a</sup>**

|                                | Changes_TF        |
|--------------------------------|-------------------|
| Mann-Whitney U                 | 39,500            |
| Wilcoxon W                     | 117,500           |
| Z                              | -2,513            |
| Asymp. Sig. (2-tailed)         | ,012              |
| Exact Sig. [2*(1-tailed Sig.)] | ,012 <sup>b</sup> |

a. Grouping Variable: Group\_OW\_Ob

b. Not corrected for ties.

**Sm vs C**

**Test Statistics<sup>a</sup>**

|                                | Changes_TF        |
|--------------------------------|-------------------|
| Mann-Whitney U                 | 26,500            |
| Wilcoxon W                     | 104,500           |
| Z                              | -2,678            |
| Asymp. Sig. (2-tailed)         | ,007              |
| Exact Sig. [2*(1-tailed Sig.)] | ,007 <sup>b</sup> |

a. Grouping Variable: Group\_OW\_Ob

b. Not corrected for ties.

**Figure 2C**

**SE vs Ex**

**Test Statistics<sup>a</sup>**

|                                | Changes_TF        |
|--------------------------------|-------------------|
| Mann-Whitney U                 | 24,500            |
| Wilcoxon W                     | 115,500           |
| Z                              | -3,079            |
| Asymp. Sig. (2-tailed)         | ,002              |
| Exact Sig. [2*(1-tailed Sig.)] | ,001 <sup>b</sup> |

a. Grouping Variable: Group\_OW\_Ob

b. Not corrected for ties.

**Ex vs Sm**

**Test Statistics<sup>a</sup>**

|                                | Changes_TF        |
|--------------------------------|-------------------|
| Mann-Whitney U                 | 70,000            |
| Wilcoxon W                     | 161,000           |
| Z                              | -,440             |
| Asymp. Sig. (2-tailed)         | ,660              |
| Exact Sig. [2*(1-tailed Sig.)] | ,689 <sup>b</sup> |

a. Grouping Variable: Group\_OW\_Ob

b. Not corrected for ties.

**SE vs Sm**

**Test Statistics<sup>a</sup>**

|                                | Changes_TF        |
|--------------------------------|-------------------|
| Mann-Whitney U                 | 37,500            |
| Wilcoxon W                     | 115,500           |
| Z                              | -2,214            |
| Asymp. Sig. (2-tailed)         | ,027              |
| Exact Sig. [2*(1-tailed Sig.)] | ,026 <sup>b</sup> |

a. Grouping Variable: Group\_OW\_Ob

b. Not corrected for ties.

**Ex vs C**

**Test Statistics<sup>a</sup>**

|                                | Changes_TF        |
|--------------------------------|-------------------|
| Mann-Whitney U                 | 43,500            |
| Wilcoxon W                     | 121,500           |
| Z                              | -1,939            |
| Asymp. Sig. (2-tailed)         | ,052              |
| Exact Sig. [2*(1-tailed Sig.)] | ,060 <sup>b</sup> |

a. Grouping Variable: Group\_OW\_Ob

b. Not corrected for ties.

**SE vs C**

**Test Statistics<sup>a</sup>**

|                                | Changes_TF        |
|--------------------------------|-------------------|
| Mann-Whitney U                 | 4,000             |
| Wilcoxon W                     | 82,000            |
| Z                              | -4,093            |
| Asymp. Sig. (2-tailed)         | ,000              |
| Exact Sig. [2*(1-tailed Sig.)] | ,000 <sup>b</sup> |

a. Grouping Variable: Group\_OW\_Ob

b. Not corrected for ties.

**Sm vs C**

**Test Statistics<sup>a</sup>**

|                                | Changes_TF        |
|--------------------------------|-------------------|
| Mann-Whitney U                 | 34,000            |
| Wilcoxon W                     | 112,000           |
| Z                              | -2,392            |
| Asymp. Sig. (2-tailed)         | ,017              |
| Exact Sig. [2*(1-tailed Sig.)] | ,028 <sup>b</sup> |

a. Grouping Variable: Group\_OW\_Ob

b. Not corrected for ties.

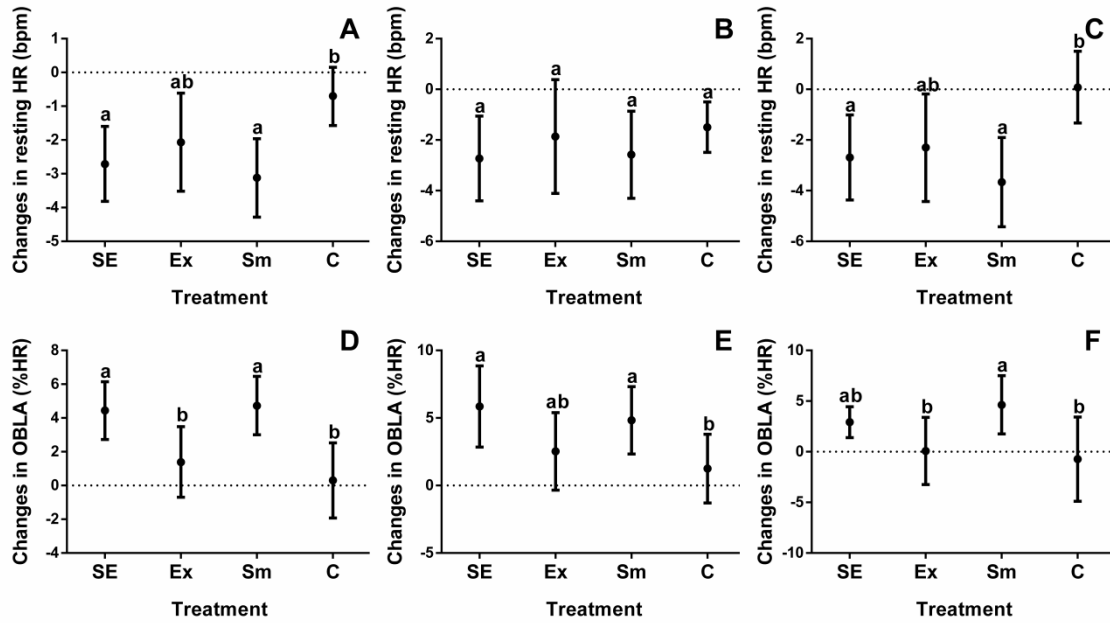

**Figure 3.** Changes in resting heart rate and onset blood lactate accumulation by treatments. HR: Heart rate; OBLA: Onset blood lactate accumulation; %HR: Percentage of maximal heart rate; SE: *Spirulina* and exercise; Ex: Exercise and placebo; Sm: *Spirulina* without exercise; and C: Control (Placebo treatment). (A) Total resting HR changes of subjects; (B) Resting HR changes in overweight subjects; (C) Resting HR changes in obesity subjects; (D) Total OBLA changes of subjects; (E) OBLA changes in overweight subjects; and (F) OBLA changes in obesity subjects. Data are presented as the mean with 95% confidence intervals. Different letters indicate the statistical differences between groups ( $p < 0.05$ ).

**Figure 3A**

**SE vs Ex**

**Test Statistics<sup>a</sup>**

|                        | Changes_HR |
|------------------------|------------|
| Mann-Whitney U         | 320,000    |
| Wilcoxon W             | 726,000    |
| Z                      | -1,188     |
| Asymp. Sig. (2-tailed) | ,235       |

a. Grouping Variable: Group\_TOTAL

**Ex vs Sm**

**Test Statistics<sup>a</sup>**

|                        | Changes_HR |
|------------------------|------------|
| Mann-Whitney U         | 248,000    |
| Wilcoxon W             | 548,000    |
| Z                      | -1,625     |
| Asymp. Sig. (2-tailed) | ,104       |

a. Grouping Variable: Group\_TOTAL

**SE vs Sm**

**Test Statistics<sup>a</sup>**

|                        | Changes_HR |
|------------------------|------------|
| Mann-Whitney U         | 303,500    |
| Wilcoxon W             | 603,500    |
| Z                      | -,601      |
| Asymp. Sig. (2-tailed) | ,548       |

a. Grouping Variable: Group\_TOTAL

**Ex vs C**

**Test Statistics<sup>a</sup>**

|                        | Changes_HR |
|------------------------|------------|
| Mann-Whitney U         | 274,000    |
| Wilcoxon W             | 680,000    |
| Z                      | -1,163     |
| Asymp. Sig. (2-tailed) | ,245       |

a. Grouping Variable: Group\_TOTAL

**SE vs C**

**Test Statistics<sup>a</sup>**

|                        | Changes_HR |
|------------------------|------------|
| Mann-Whitney U         | 176,000    |
| Wilcoxon W             | 582,000    |
| Z                      | -3,000     |
| Asymp. Sig. (2-tailed) | ,003       |

a. Grouping Variable: Group\_TOTAL

**Sm vs C**

**Test Statistics<sup>a</sup>**

|                        | Changes_HR |
|------------------------|------------|
| Mann-Whitney U         | 130,000    |
| Wilcoxon W             | 430,000    |
| Z                      | -3,305     |
| Asymp. Sig. (2-tailed) | ,001       |

a. Grouping Variable: Group\_TOTAL

**Figure 3B**

**SE vs Ex**

**Test Statistics<sup>a</sup>**

|                                | Changes_HR        |
|--------------------------------|-------------------|
| Mann-Whitney U                 | 88,500            |
| Wilcoxon W                     | 208,500           |
| Z                              | -1,003            |
| Asymp. Sig. (2-tailed)         | ,316              |
| Exact Sig. [2*(1-tailed Sig.)] | ,325 <sup>b</sup> |

a. Grouping Variable: Group\_OW\_Ob

b. Not corrected for ties.

**Ex vs Sm**

**Test Statistics<sup>a</sup>**

|                                | Changes_HR        |
|--------------------------------|-------------------|
| Mann-Whitney U                 | 72,000            |
| Wilcoxon W                     | 150,000           |
| Z                              | -,886             |
| Asymp. Sig. (2-tailed)         | ,376              |
| Exact Sig. [2*(1-tailed Sig.)] | ,399 <sup>b</sup> |

a. Grouping Variable: Group\_OW\_Ob

b. Not corrected for ties.

**SE vs Sm**

**Test Statistics<sup>a</sup>**

|                                | Changes_HR        |
|--------------------------------|-------------------|
| Mann-Whitney U                 | 88,500            |
| Wilcoxon W                     | 208,500           |
| Z                              | -,074             |
| Asymp. Sig. (2-tailed)         | ,941              |
| Exact Sig. [2*(1-tailed Sig.)] | ,943 <sup>b</sup> |

a. Grouping Variable: Group\_OW\_Ob

b. Not corrected for ties.

**Ex vs C**

**Test Statistics<sup>a</sup>**

|                                | Changes_HR         |
|--------------------------------|--------------------|
| Mann-Whitney U                 | 90,000             |
| Wilcoxon W                     | 168,000            |
| Z                              | ,000               |
| Asymp. Sig. (2-tailed)         | 1,000              |
| Exact Sig. [2*(1-tailed Sig.)] | 1,000 <sup>b</sup> |

a. Grouping Variable: Group\_OW\_Ob

b. Not corrected for ties.

**SE vs C**

**Test Statistics<sup>a</sup>**

|                                | Changes_HR        |
|--------------------------------|-------------------|
| Mann-Whitney U                 | 58,000            |
| Wilcoxon W                     | 178,000           |
| Z                              | -1,590            |
| Asymp. Sig. (2-tailed)         | ,112              |
| Exact Sig. [2*(1-tailed Sig.)] | ,126 <sup>b</sup> |

a. Grouping Variable: Group\_OW\_Ob

b. Not corrected for ties.

**Sm vs C**

**Test Statistics<sup>a</sup>**

|                                | Changes_HR        |
|--------------------------------|-------------------|
| Mann-Whitney U                 | 48,500            |
| Wilcoxon W                     | 126,500           |
| Z                              | -1,383            |
| Asymp. Sig. (2-tailed)         | ,167              |
| Exact Sig. [2*(1-tailed Sig.)] | ,178 <sup>b</sup> |

a. Grouping Variable: Group\_OW\_Ob

b. Not corrected for ties.

**Figure 3C**

**SE vs Ex**

**Test Statistics<sup>a</sup>**

|                                | Changes_HR        |
|--------------------------------|-------------------|
| Mann-Whitney U                 | 71,500            |
| Wilcoxon W                     | 162,500           |
| Z                              | -,672             |
| Asymp. Sig. (2-tailed)         | ,502              |
| Exact Sig. [2*(1-tailed Sig.)] | ,511 <sup>b</sup> |

a. Grouping Variable: Group\_OW\_Ob

b. Not corrected for ties.

**Ex vs Sm**

**Test Statistics<sup>a</sup>**

|                                | Changes_HR        |
|--------------------------------|-------------------|
| Mann-Whitney U                 | 51,000            |
| Wilcoxon W                     | 129,000           |
| Z                              | -1,475            |
| Asymp. Sig. (2-tailed)         | ,140              |
| Exact Sig. [2*(1-tailed Sig.)] | ,152 <sup>b</sup> |

a. Grouping Variable: Group\_OW\_Ob

b. Not corrected for ties.

**SE vs Sm**

**Test Statistics<sup>a</sup>**

|                                | Changes_HR        |
|--------------------------------|-------------------|
| Mann-Whitney U                 | 65,000            |
| Wilcoxon W                     | 143,000           |
| Z                              | -,715             |
| Asymp. Sig. (2-tailed)         | ,474              |
| Exact Sig. [2*(1-tailed Sig.)] | ,503 <sup>b</sup> |

a. Grouping Variable: Group\_OW\_Ob

b. Not corrected for ties.

**Ex vs C**

**Test Statistics<sup>a</sup>**

|                                | Changes_HR        |
|--------------------------------|-------------------|
| Mann-Whitney U                 | 47,000            |
| Wilcoxon W                     | 138,000           |
| Z                              | -1,728            |
| Asymp. Sig. (2-tailed)         | ,084              |
| Exact Sig. [2*(1-tailed Sig.)] | ,098 <sup>b</sup> |

a. Grouping Variable: Group\_OW\_Ob

b. Not corrected for ties.

**SE vs C**

**Test Statistics<sup>a</sup>**

|                                | Changes_HR        |
|--------------------------------|-------------------|
| Mann-Whitney U                 | 33,000            |
| Wilcoxon W                     | 124,000           |
| Z                              | -2,521            |
| Asymp. Sig. (2-tailed)         | ,012              |
| Exact Sig. [2*(1-tailed Sig.)] | ,014 <sup>b</sup> |

a. Grouping Variable: Group\_OW\_Ob

b. Not corrected for ties.

**Sm vs C**

**Test Statistics<sup>a</sup>**

|                                | Changes_HR        |
|--------------------------------|-------------------|
| Mann-Whitney U                 | 20,000            |
| Wilcoxon W                     | 98,000            |
| Z                              | -3,046            |
| Asymp. Sig. (2-tailed)         | ,002              |
| Exact Sig. [2*(1-tailed Sig.)] | ,002 <sup>b</sup> |

a. Grouping Variable: Group\_OW\_Ob

b. Not corrected for ties.

**Figure 3D**

**SE vs Ex**

**Test Statistics<sup>a</sup>**

|                        | Changes_OBLA |
|------------------------|--------------|
| Mann-Whitney U         | 261,500      |
| Wilcoxon W             | 667,500      |
| Z                      | -1,970       |
| Asymp. Sig. (2-tailed) | ,049         |

a. Grouping Variable: Group\_TOTAL

**Ex vs Sm**

**Test Statistics<sup>a</sup>**

|                        | Changes_OBLA |
|------------------------|--------------|
| Mann-Whitney U         | 192,500      |
| Wilcoxon W             | 598,500      |
| Z                      | -2,461       |
| Asymp. Sig. (2-tailed) | ,014         |

a. Grouping Variable: Group\_TOTAL

**SE vs Sm**

**Test Statistics<sup>a</sup>**

|                        | Changes_OBLA |
|------------------------|--------------|
| Mann-Whitney U         | 289,500      |
| Wilcoxon W             | 667,500      |
| Z                      | -,411        |
| Asymp. Sig. (2-tailed) | ,681         |

a. Grouping Variable: Group\_TOTAL

**Ex vs C**

**Test Statistics<sup>a</sup>**

|                        | Changes_OBLA |
|------------------------|--------------|
| Mann-Whitney U         | 283,500      |
| Wilcoxon W             | 559,500      |
| Z                      | -,733        |
| Asymp. Sig. (2-tailed) | ,464         |

a. Grouping Variable: Group\_TOTAL

**SE vs C**

**Test Statistics<sup>a</sup>**

|                        | Changes_OBLA |
|------------------------|--------------|
| Mann-Whitney U         | 177,000      |
| Wilcoxon W             | 453,000      |
| Z                      | -2,610       |
| Asymp. Sig. (2-tailed) | ,009         |

a. Grouping Variable: Group\_TOTAL

**Sm vs C**

**Test Statistics<sup>a</sup>**

|                        | Changes_OBLA |
|------------------------|--------------|
| Mann-Whitney U         | 121,000      |
| Wilcoxon W             | 397,000      |
| Z                      | -3,165       |
| Asymp. Sig. (2-tailed) | ,002         |

a. Grouping Variable: Group\_TOTAL



**Figure 3E**

**SE vs Ex**

**Test Statistics<sup>a</sup>**

|                                | Changes_OBLA      |
|--------------------------------|-------------------|
| Mann-Whitney U                 | 72,000            |
| Wilcoxon W                     | 192,000           |
| Z                              | -1,446            |
| Asymp. Sig. (2-tailed)         | ,148              |
| Exact Sig. [2*(1-tailed Sig.)] | ,158 <sup>b</sup> |

a. Grouping Variable: Group\_OW\_Ob

b. Not corrected for ties.

**Ex vs Sm**

**Test Statistics<sup>a</sup>**

|                                | Changes_OBLA      |
|--------------------------------|-------------------|
| Mann-Whitney U                 | 65,000            |
| Wilcoxon W                     | 185,000           |
| Z                              | -1,225            |
| Asymp. Sig. (2-tailed)         | ,221              |
| Exact Sig. [2*(1-tailed Sig.)] | ,236 <sup>b</sup> |

a. Grouping Variable: Group\_OW\_Ob

b. Not corrected for ties.

**SE vs Sm**

**Test Statistics<sup>a</sup>**

|                                | Changes_OBLA      |
|--------------------------------|-------------------|
| Mann-Whitney U                 | 75,000            |
| Wilcoxon W                     | 153,000           |
| Z                              | -,465             |
| Asymp. Sig. (2-tailed)         | ,642              |
| Exact Sig. [2*(1-tailed Sig.)] | ,667 <sup>b</sup> |

a. Grouping Variable: Group\_OW\_Ob

b. Not corrected for ties.

**Ex vs C**

**Test Statistics<sup>a</sup>**

|                                | Changes_OBLA      |
|--------------------------------|-------------------|
| Mann-Whitney U                 | 76,000            |
| Wilcoxon W                     | 154,000           |
| Z                              | -,685             |
| Asymp. Sig. (2-tailed)         | ,493              |
| Exact Sig. [2*(1-tailed Sig.)] | ,516 <sup>b</sup> |

a. Grouping Variable: Group\_OW\_Ob

b. Not corrected for ties.

**SE vs C**

**Test Statistics<sup>a</sup>**

|                                | Changes_OBLA      |
|--------------------------------|-------------------|
| Mann-Whitney U                 | 43,000            |
| Wilcoxon W                     | 121,000           |
| Z                              | -2,118            |
| Asymp. Sig. (2-tailed)         | ,034              |
| Exact Sig. [2*(1-tailed Sig.)] | ,036 <sup>b</sup> |

a. Grouping Variable: Group\_OW\_Ob

b. Not corrected for ties.

**Sm vs C**

**Test Statistics<sup>a</sup>**

|                                | Changes_OBLA      |
|--------------------------------|-------------------|
| Mann-Whitney U                 | 38,000            |
| Wilcoxon W                     | 116,000           |
| Z                              | -1,972            |
| Asymp. Sig. (2-tailed)         | ,049              |
| Exact Sig. [2*(1-tailed Sig.)] | ,052 <sup>b</sup> |

a. Grouping Variable: Group\_OW\_Ob

b. Not corrected for ties.

**Figure 3F**

**SE vs Ex**

**Test Statistics<sup>a</sup>**

|                                | Changes_OBLA      |
|--------------------------------|-------------------|
| Mann-Whitney U                 | 56,500            |
| Wilcoxon W                     | 147,500           |
| Z                              | -1,450            |
| Asymp. Sig. (2-tailed)         | ,147              |
| Exact Sig. [2*(1-tailed Sig.)] | ,153 <sup>b</sup> |

a. Grouping Variable: Group\_OW\_Ob

b. Not corrected for ties.

**Ex vs Sm**

**Test Statistics<sup>a</sup>**

|                                | Changes_OBLA      |
|--------------------------------|-------------------|
| Mann-Whitney U                 | 34,000            |
| Wilcoxon W                     | 125,000           |
| Z                              | -2,181            |
| Asymp. Sig. (2-tailed)         | ,029              |
| Exact Sig. [2*(1-tailed Sig.)] | ,030 <sup>b</sup> |

a. Grouping Variable: Group\_OW\_Ob

b. Not corrected for ties.

**SE vs Sm**

**Test Statistics<sup>a</sup>**

|                                | Changes_OBLA      |
|--------------------------------|-------------------|
| Mann-Whitney U                 | 54,500            |
| Wilcoxon W                     | 145,500           |
| Z                              | -,995             |
| Asymp. Sig. (2-tailed)         | ,320              |
| Exact Sig. [2*(1-tailed Sig.)] | ,331 <sup>b</sup> |

a. Grouping Variable: Group\_OW\_Ob

b. Not corrected for ties.

**Ex vs C**

**Test Statistics<sup>a</sup>**

|                                | Changes_OBLA      |
|--------------------------------|-------------------|
| Mann-Whitney U                 | 62,500            |
| Wilcoxon W                     | 128,500           |
| Z                              | -,528             |
| Asymp. Sig. (2-tailed)         | ,597              |
| Exact Sig. [2*(1-tailed Sig.)] | ,608 <sup>b</sup> |

a. Grouping Variable: Group\_OW\_Ob

b. Not corrected for ties.

**SE vs C**

**Test Statistics<sup>a</sup>**

|                                | Changes_OBLA      |
|--------------------------------|-------------------|
| Mann-Whitney U                 | 41,500            |
| Wilcoxon W                     | 107,500           |
| Z                              | -1,760            |
| Asymp. Sig. (2-tailed)         | ,078              |
| Exact Sig. [2*(1-tailed Sig.)] | ,082 <sup>b</sup> |

a. Grouping Variable: Group\_OW\_Ob

b. Not corrected for ties.

**Sm vs C**

**Test Statistics<sup>a</sup>**

|                                | Changes_OBLA      |
|--------------------------------|-------------------|
| Mann-Whitney U                 | 24,500            |
| Wilcoxon W                     | 90,500            |
| Z                              | -2,384            |
| Asymp. Sig. (2-tailed)         | ,017              |
| Exact Sig. [2*(1-tailed Sig.)] | ,016 <sup>b</sup> |

a. Grouping Variable: Group\_OW\_Ob

b. Not corrected for ties.

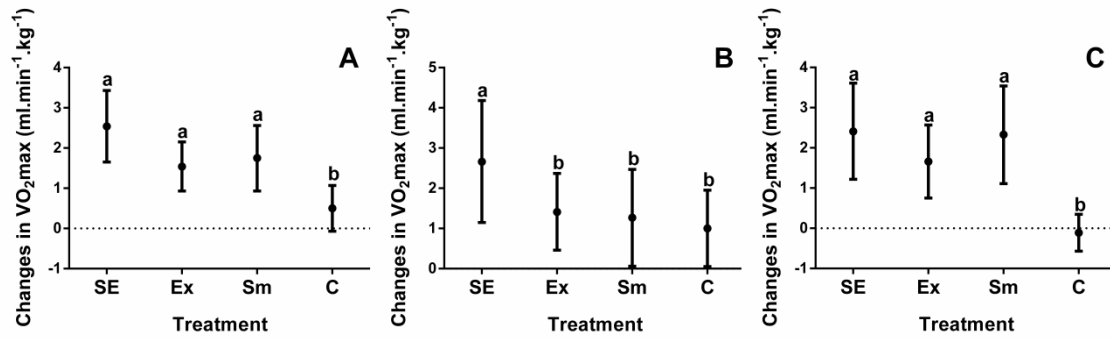

**Figure 4.** Changes in maximal oxygen uptake by treatments. VO<sub>2</sub>max: Maximal oxygen uptake; SE: *Spirulina* and exercise; Ex: Exercise and placebo; Sm: *Spirulina* without exercise; and C: Control (Placebo treatment). **(A)** Total VO<sub>2</sub>max changes of subjects; **(B)** VO<sub>2</sub>max changes in overweight subjects; and **(C)** VO<sub>2</sub>max changes in subjects with obesity. Data are shown as the mean, with 95% confidence intervals. Different letters indicate the statistical differences between groups ( $p < 0.05$ ).

**Figure 4A**

**SE vs Ex**

**Test Statistics<sup>a</sup>**

|                        | Changes_VO2<br>max |
|------------------------|--------------------|
| Mann-Whitney U         | 213,000            |
| Wilcoxon W             | 513,000            |
| Z                      | -1,580             |
| Asymp. Sig. (2-tailed) | ,114               |

a. Grouping Variable: Group\_TOTAL

**SE vs Sm**

**Test Statistics<sup>a</sup>**

|                        | Changes_VO2<br>max |
|------------------------|--------------------|
| Mann-Whitney U         | 194,000            |
| Wilcoxon W             | 404,000            |
| Z                      | -1,098             |
| Asymp. Sig. (2-tailed) | ,272               |

a. Grouping Variable: Group\_TOTAL

**SE vs C**

**Test Statistics<sup>a</sup>**

|                        | Changes_VO2<br>max |
|------------------------|--------------------|
| Mann-Whitney U         | 101,000            |
| Wilcoxon W             | 311,000            |
| Z                      | -3,340             |
| Asymp. Sig. (2-tailed) | ,001               |

a. Grouping Variable: Group\_TOTAL

**Ex vs Sm**

**Test Statistics<sup>a</sup>**

|                        | Changes_VO2<br>max |
|------------------------|--------------------|
| Mann-Whitney U         | 219,000            |
| Wilcoxon W             | 519,000            |
| Z                      | -,506              |
| Asymp. Sig. (2-tailed) | ,613               |

a. Grouping Variable: Group\_TOTAL

**Ex vs C**

**Test Statistics<sup>a</sup>**

|                        | Changes_VO2<br>max |
|------------------------|--------------------|
| Mann-Whitney U         | 138,000            |
| Wilcoxon W             | 348,000            |
| Z                      | -2,481             |
| Asymp. Sig. (2-tailed) | ,013               |

a. Grouping Variable: Group\_TOTAL

**Sm vs C**

**Test Statistics<sup>a</sup>**

|                                | Changes_VO2<br>max |
|--------------------------------|--------------------|
| Mann-Whitney U                 | 114,000            |
| Wilcoxon W                     | 324,000            |
| Z                              | -2,373             |
| Asymp. Sig. (2-tailed)         | ,018               |
| Exact Sig. [2*(1-tailed Sig.)] | ,020 <sup>b</sup>  |

a. Grouping Variable: Group\_TOTAL

b. Not corrected for ties.

**Figure 4B**

**SE vs Ex**

**Test Statistics<sup>a</sup>**

|                                | Changes_VO2<br>max |
|--------------------------------|--------------------|
| Mann-Whitney U                 | 50,000             |
| Wilcoxon W                     | 128,000            |
| Z                              | -1,299             |
| Asymp. Sig. (2-tailed)         | ,194               |
| Exact Sig. [2*(1-tailed Sig.)] | ,219 <sup>b</sup>  |

a. Grouping Variable: Group\_OW\_Ob

b. Not corrected for ties.

**Ex vs Sm**

**Test Statistics<sup>a</sup>**

|                                | Changes_VO2<br>max |
|--------------------------------|--------------------|
| Mann-Whitney U                 | 60,000             |
| Wilcoxon W                     | 126,000            |
| Z                              | -,378              |
| Asymp. Sig. (2-tailed)         | ,705               |
| Exact Sig. [2*(1-tailed Sig.)] | ,740 <sup>b</sup>  |

a. Grouping Variable: Group\_OW\_Ob

b. Not corrected for ties.

**SE vs Sm**

**Test Statistics<sup>a</sup>**

|                                | Changes_VO2<br>max |
|--------------------------------|--------------------|
| Mann-Whitney U                 | 43,000             |
| Wilcoxon W                     | 109,000            |
| Z                              | -1,434             |
| Asymp. Sig. (2-tailed)         | ,152               |
| Exact Sig. [2*(1-tailed Sig.)] | ,169 <sup>b</sup>  |

a. Grouping Variable: Group\_OW\_Ob

b. Not corrected for ties.

**Ex vs C**

**Test Statistics<sup>a</sup>**

|                                | Changes_VO2<br>max |
|--------------------------------|--------------------|
| Mann-Whitney U                 | 58,000             |
| Wilcoxon W                     | 124,000            |
| Z                              | -,505              |
| Asymp. Sig. (2-tailed)         | ,613               |
| Exact Sig. [2*(1-tailed Sig.)] | ,651 <sup>b</sup>  |

a. Grouping Variable: Group\_OW\_Ob

b. Not corrected for ties.

**SE vs C**

**Test Statistics<sup>a</sup>**

|                                | Changes_VO2<br>max |
|--------------------------------|--------------------|
| Mann-Whitney U                 | 41,000             |
| Wilcoxon W                     | 107,000            |
| Z                              | -1,560             |
| Asymp. Sig. (2-tailed)         | ,119               |
| Exact Sig. [2*(1-tailed Sig.)] | ,134 <sup>b</sup>  |

a. Grouping Variable: Group\_OW\_Ob

b. Not corrected for ties.

**Sm vs C**

**Test Statistics<sup>a</sup>**

|                                | Changes_VO2<br>max |
|--------------------------------|--------------------|
| Mann-Whitney U                 | 55,500             |
| Wilcoxon W                     | 121,500            |
| Z                              | -,334              |
| Asymp. Sig. (2-tailed)         | ,738               |
| Exact Sig. [2*(1-tailed Sig.)] | ,748 <sup>b</sup>  |

a. Grouping Variable: Group\_OW\_Ob

b. Not corrected for ties.

**Figure 4C**

**SE vs Ex**

**Test Statistics<sup>a</sup>**

|                                | Changes_VO2<br>max |
|--------------------------------|--------------------|
| Mann-Whitney U                 | 55,500             |
| Wilcoxon W                     | 133,500            |
| Z                              | -,977              |
| Asymp. Sig. (2-tailed)         | ,329               |
| Exact Sig. [2*(1-tailed Sig.)] | ,347 <sup>b</sup>  |

a. Grouping Variable: Group\_OW\_Ob

b. Not corrected for ties.

**Ex vs Sm**

**Test Statistics<sup>a</sup>**

|                                | Changes_VO2<br>max |
|--------------------------------|--------------------|
| Mann-Whitney U                 | 39,500             |
| Wilcoxon W                     | 117,500            |
| Z                              | -1,075             |
| Asymp. Sig. (2-tailed)         | ,282               |
| Exact Sig. [2*(1-tailed Sig.)] | ,310 <sup>b</sup>  |

a. Grouping Variable: Group\_OW\_Ob

b. Not corrected for ties.

**SE vs Sm**

**Test Statistics<sup>a</sup>**

|                                | Changes_VO2<br>max |
|--------------------------------|--------------------|
| Mann-Whitney U                 | 53,500             |
| Wilcoxon W                     | 131,500            |
| Z                              | -,036              |
| Asymp. Sig. (2-tailed)         | ,971               |
| Exact Sig. [2*(1-tailed Sig.)] | ,972 <sup>b</sup>  |

a. Grouping Variable: Group\_OW\_Ob

b. Not corrected for ties.

**Ex vs C**

**Test Statistics<sup>a</sup>**

|                                | Changes_VO2<br>max |
|--------------------------------|--------------------|
| Mann-Whitney U                 | 10,500             |
| Wilcoxon W                     | 55,500             |
| Z                              | -3,222             |
| Asymp. Sig. (2-tailed)         | ,001               |
| Exact Sig. [2*(1-tailed Sig.)] | ,001 <sup>b</sup>  |

a. Grouping Variable: Group\_OW\_Ob

b. Not corrected for ties.

**SE vs C**

**Test Statistics<sup>a</sup>**

|                                | Changes_VO2<br>max |
|--------------------------------|--------------------|
| Mann-Whitney U                 | 9,500              |
| Wilcoxon W                     | 54,500             |
| Z                              | -3,270             |
| Asymp. Sig. (2-tailed)         | ,001               |
| Exact Sig. [2*(1-tailed Sig.)] | ,001 <sup>b</sup>  |

a. Grouping Variable: Group\_OW\_Ob

b. Not corrected for ties.

**Sm vs C**

**Test Statistics<sup>a</sup>**

|                                | Changes_VO2<br>max |
|--------------------------------|--------------------|
| Mann-Whitney U                 | 1,500              |
| Wilcoxon W                     | 46,500             |
| Z                              | -3,550             |
| Asymp. Sig. (2-tailed)         | ,000               |
| Exact Sig. [2*(1-tailed Sig.)] | ,000 <sup>b</sup>  |

a. Grouping Variable: Group\_OW\_Ob

b. Not corrected for ties.
